# Supplementary material for: A Dual-Path Pulse-Echo Instrument for Liquid-Phase Speed of Sound and Measurements on p-Xylene and Four Halogenated-Olefin Refrigerants [R1234yf, R1234ze(E), R1233zd(E), and R1336mzz(Z)]
Source: PubMed Central journal article supplement — Ind Eng Chem Res. 2023 Jul 28;62(31):12381–406. doi: 10.1021/acs.iecr.3c01720 (PMC10416216; doi:10.1021/acs.iecr.3c01720), 2023-07-28
Supplement: ie3c01720_si_001.pdf [file ie3c01720_si_001.pdf]

## SUPPORTING INFORMATION

### **A Dual-Path Pulse-Echo Instrument for Speed of Sound of Liquids and Measurements on *p*-Xylene and Four Halogenated-Olefin Refrigerants [R1234yf, R1234ze(E), R1233zd(E), and R1336mzz(Z)]<sup>1</sup>**

Mark O. McLinden\*, Richard A. Perkins

Applied Chemicals and Materials Division  
National Institute of Standards and Technology  
325 Broadway, Mailstop 647.08, Boulder, Colorado 80305 USA

This Supporting Information section presents additional figures showing details of the instrument. All measured values from which the average values reported in the tables were calculated and details on the uncertainties for each measured point are presented as txt files.

#### **List of Figures**

- Fig. S1. Detail of the electrical contact to the quartz crystal.
- Fig. S2. Photograph of the electrical feedthrough.
- Fig. S3. Cross section of the pressure vessel.
- Fig. S4. Photograph of the thermostatic bath and pressure/filling manifold.
- Fig. S5. Photograph of the electronics rack.
- Fig. S6. Example of weak echo signals.
- Fig. S7. Measured speed-of-sound data for propane; ✕, data of Meier; ○, present data.
- Fig. S8. Deviations of propane speed-of-sound data from EOS of Lemmon et al.; ✕, data of Meier; ○, present data.

---

<sup>1</sup> Contribution of the National Institute of Standards and Technology. Not subject to copyright in the United States.

\* Corresponding author; [mark.mclinden@nist.gov](mailto:mark.mclinden@nist.gov)

## List of Tables—Detailed Experimental Information

(contained in zip file in tab-delimited format)

Nomenclature for data tables.

- Table S1. Experimental liquid-phase sound speeds for propane. filename: propane.txt
- Table S2. Experimental liquid-phase sound speeds for *p*-xylene. filename: p\_xylene.txt
- Table S3. Experimental liquid-phase sound speeds for R1234yf (2,3,3,3-tetrafluoroprop-1-ene). filename: R1234yf.txt
- Table S4. Experimental liquid-phase sound speeds for R1234ze(E) (trans-1,3,3,3-tetrafluoroprop-1-ene). filename: R1234ze(E).txt
- Table S5. Experimental liquid-phase sound speeds for R1233zd(E) (trans-1-chloro-3,3,3-trifluoroprop-1-ene). filename: R1233zd(E).txt
- Table S6. Experimental liquid-phase sound speeds for R1336mzz(Z) (cis-1,1,1,4,4,4-hexafluorobut-2-ene). filename: R1336mzz(Z).txt

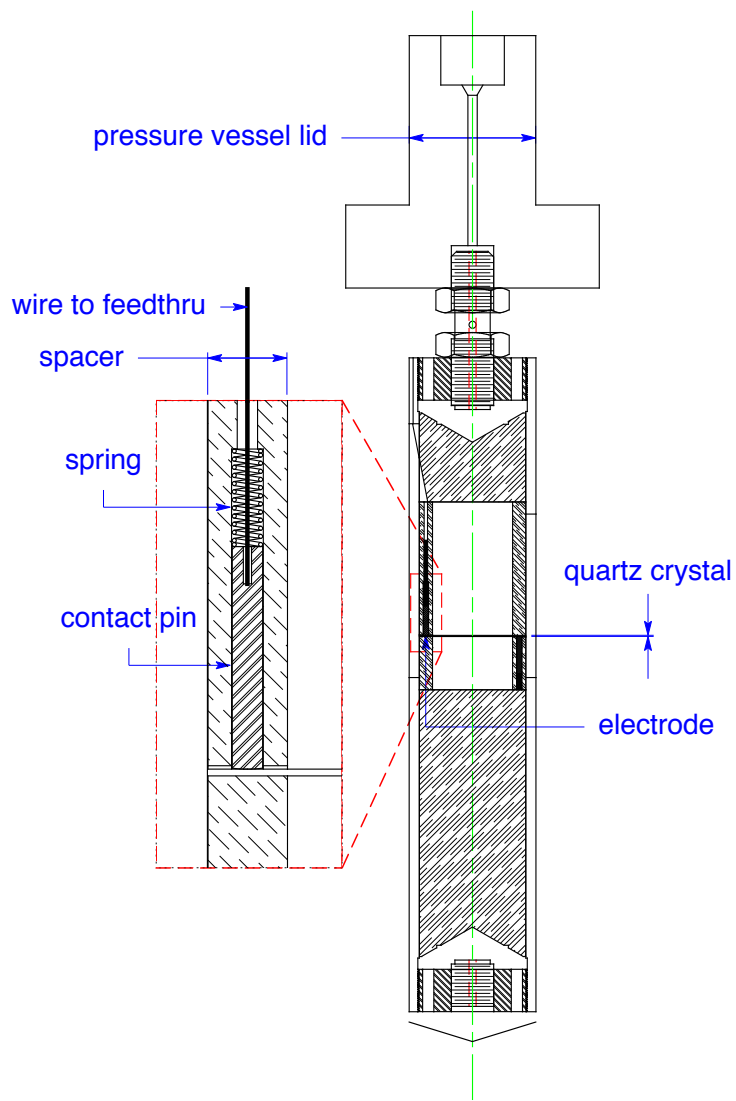

Fig. S1. Detail of the electrical contact to the quartz crystal.

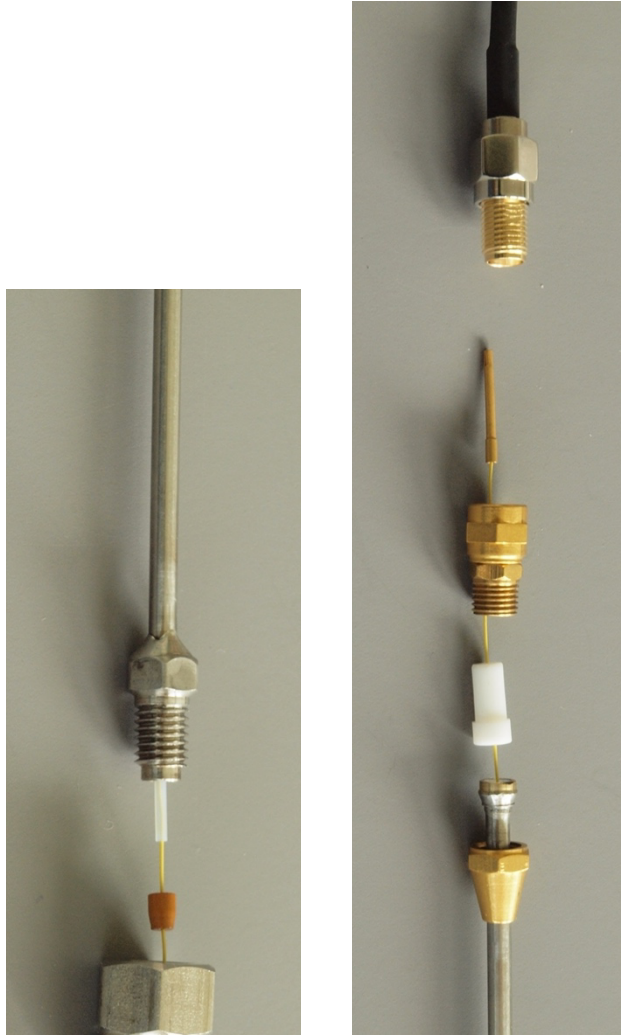

Fig. S2. Photograph of the electrical feedthrough; left: lower portion; right: upper portion.

Pressure vessel for NIST pulse-echo instrument  
modified HiP model GC1:  
1.125" bore, 6.50" deep from top of main body  
HF4 fitting on cap  
HF2 fitting at bottom  
inside of cap, tapped 7/16-20

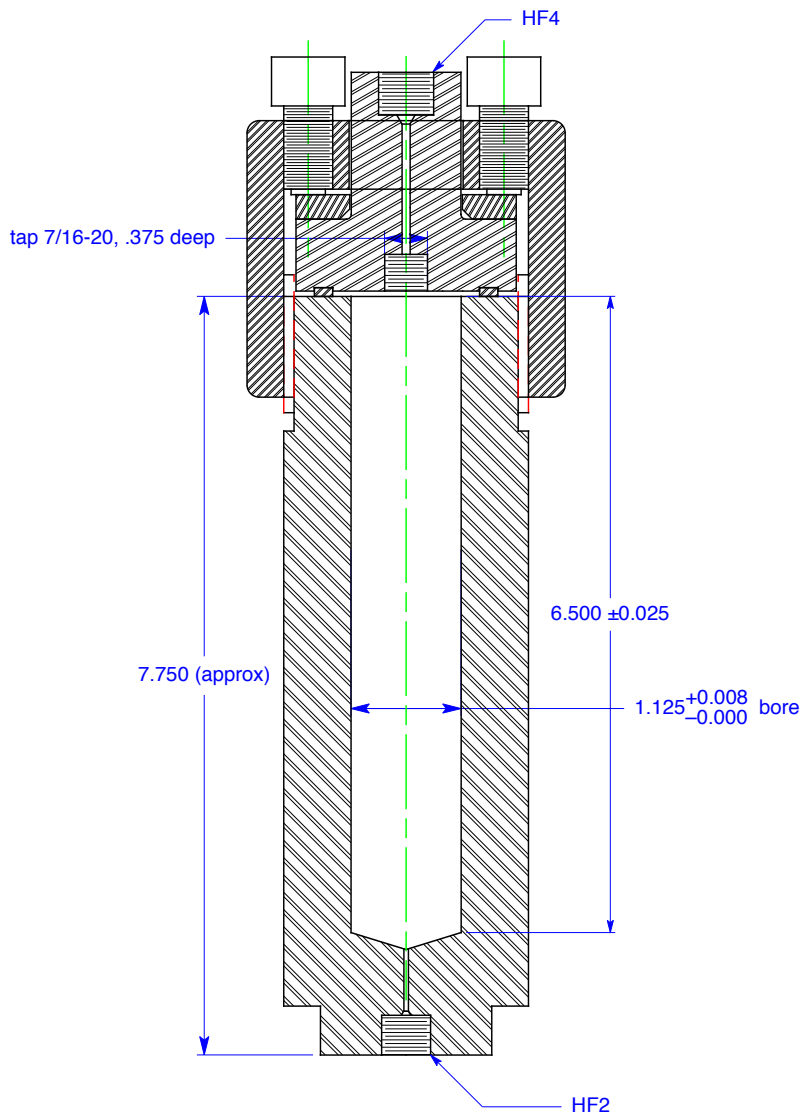

Fig. S3. Cross section of the pressure vessel (custom version of High Pressure Equipment Company model GC1); material is type 316 stainless steel; dimension are in inches.

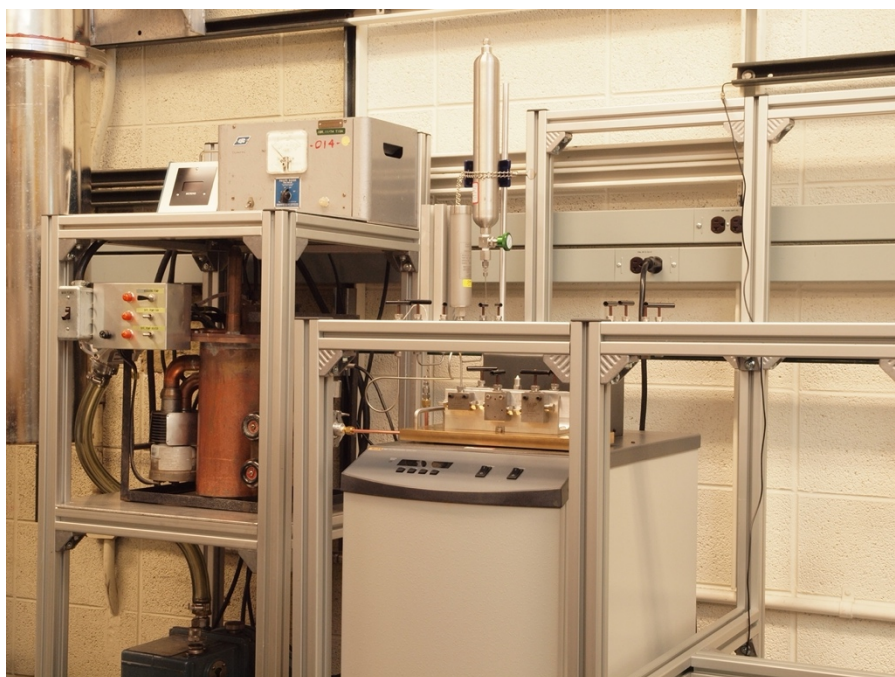

Fig. S4 Photograph of the thermostatic bath and pressure/filling manifold; the vacuum system is to the left..

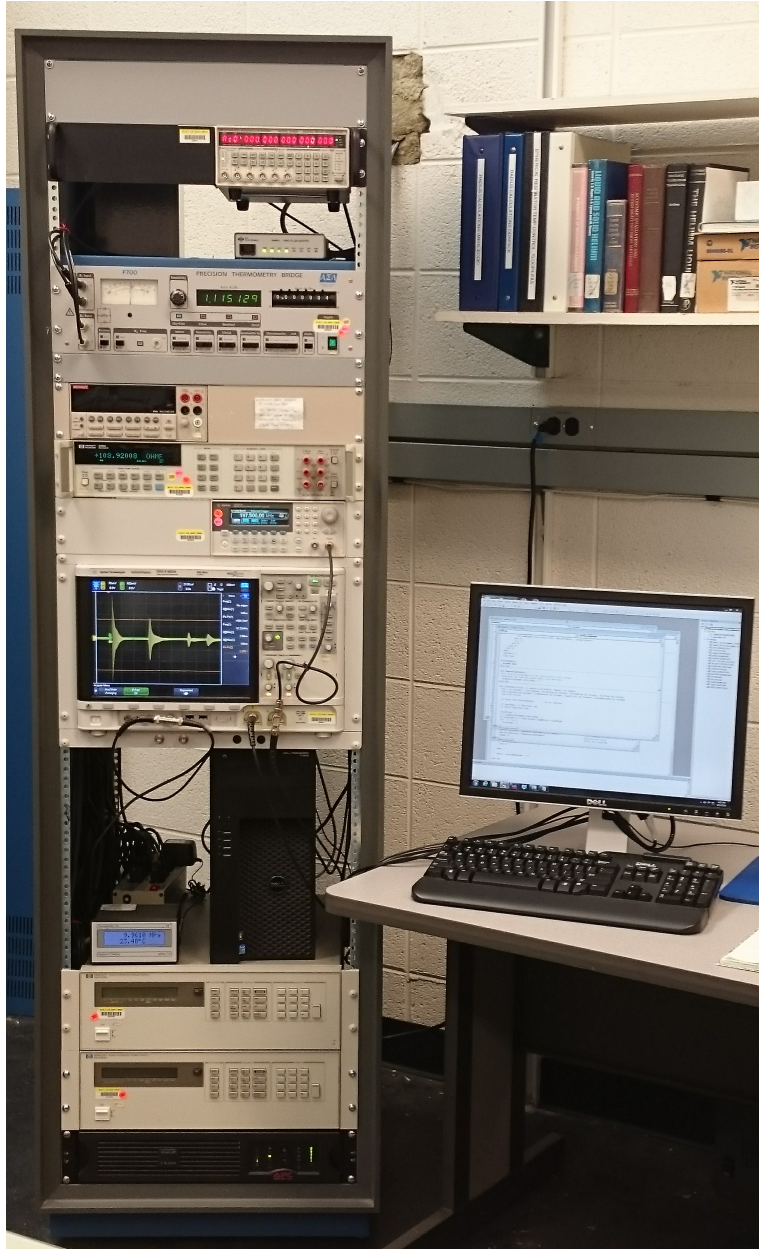

Fig. S5. Photograph of the electronics rack.

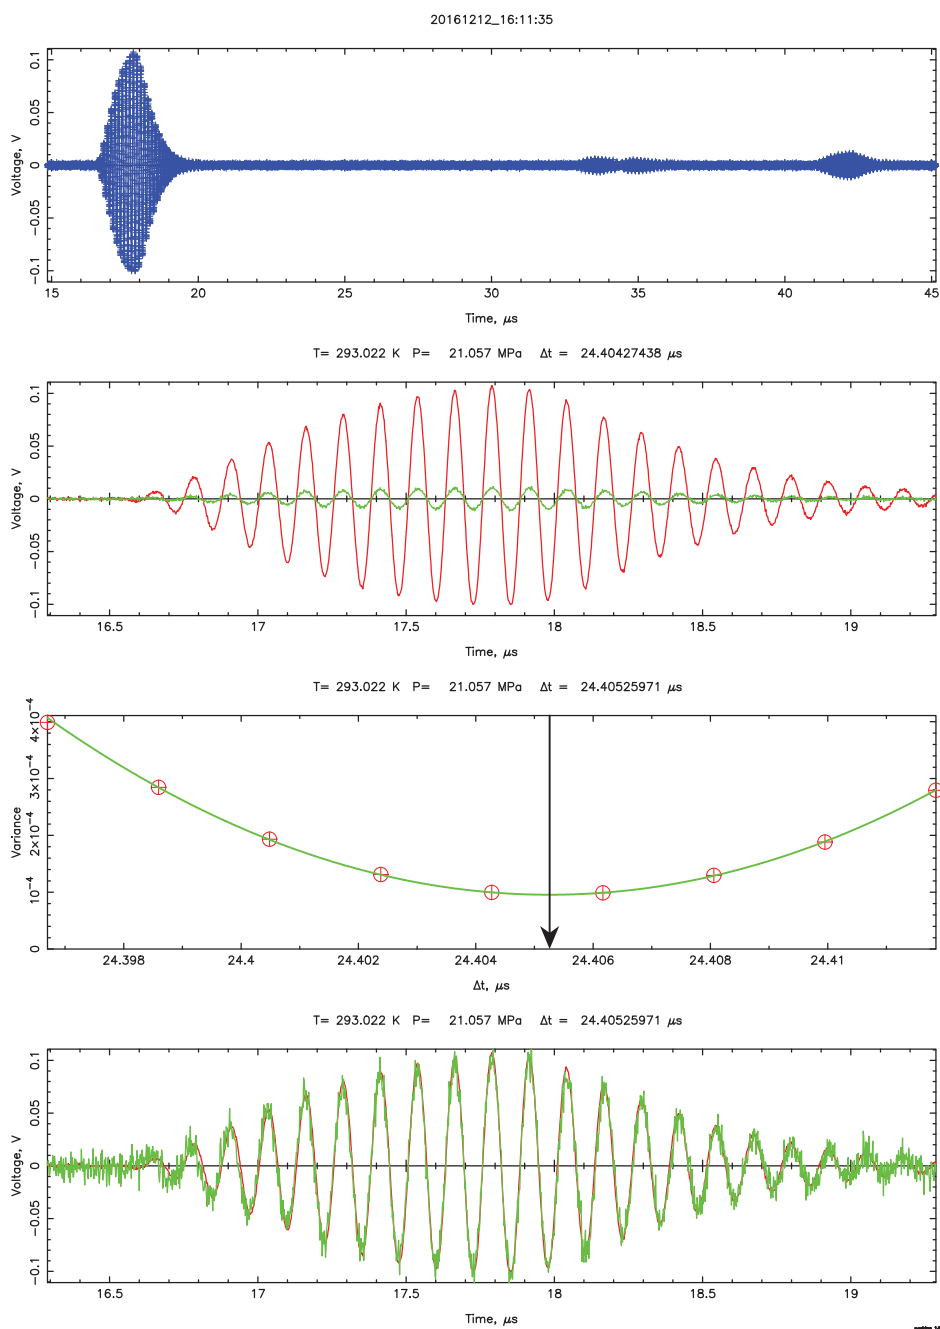

Fig S6. Example of weak echo signals; shown is POE-7 (pentaerythritol tetraheptanoate,  $\text{C}_{33}\text{H}_{60}\text{O}_8$ , CAS # 25811-35-2) at  $T = 293 \text{ K}$ ,  $p = 21 \text{ MPa}$  from Bruno et al.<sup>2</sup>

<sup>2</sup>Bruno, T. J.; Fortin, T. J.; Huber, M. L.; Laesecke, A.; Lemmon, E. W.; Mansfield, E.; McLinden, M. O.; Outcalt, S. L.; Perkins, R. A.; Urness, K. N.; Widgren, J. A. *Thermophysical Properties of Polyol Ester Lubricants*; Natl. Inst. Stand. Technol. Report 8263: 2019.



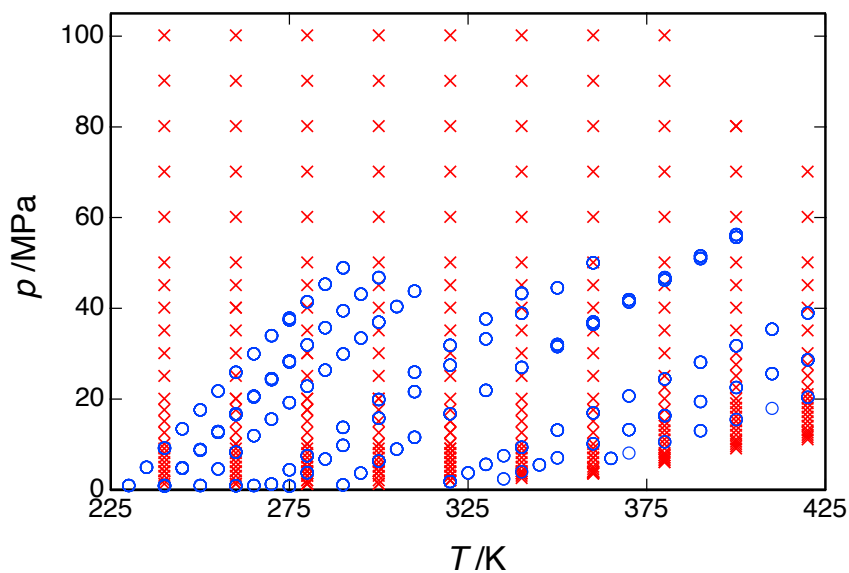

Fig S7. Measured speed-of-sound data for propane;  $\times$ , data of Meier<sup>3</sup>;  $\circ$ , present data.

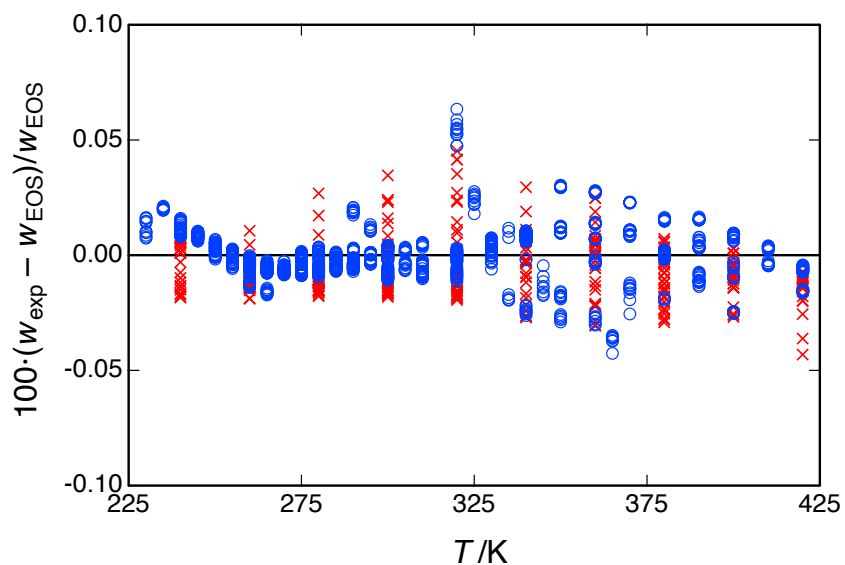

Fig S8. Deviations of propane speed-of-sound data from EOS of Lemmon et al.<sup>4</sup>;  $\times$ , data of Meier<sup>3</sup>;  $\circ$ , present data.

<sup>3</sup> Meier, K.; Kabelac, S., Thermodynamic Properties of Propane. IV. Speed of Sound in the Liquid and Supercritical Regions. *J. Chem. Engr. Data* 2012, 57, 3391-3398.

<sup>4</sup> Lemmon, E. W.; Wagner, W.; McLinden, M. O., Thermodynamic properties of propane. III. Equation of state. *Journal of Chemical and Engineering Data* 2009, 54, 3141-3180.

## Tables S1 – S6: Nomenclature.

Note: The data files in the Supplemental Information are tab-delimited text files. A “#” character in column 1 indicates a comment or other non-data line. The data columns are as follows:

| <u>Heading</u> | <u>Explanation</u>                                                                                                                                                                                                                      |
|----------------|-----------------------------------------------------------------------------------------------------------------------------------------------------------------------------------------------------------------------------------------|
| year mo dy     | date in format: yyyy mm dd                                                                                                                                                                                                              |
| time           | time in format: hh:mm                                                                                                                                                                                                                   |
| elapsed hr     | elapsed time (hours) since start of isochore or isotherm                                                                                                                                                                                |
| T(K)           | temperature $T/K$                                                                                                                                                                                                                       |
| p(MPa)         | pressure $p/MPa$ , including hydrostatic head correction                                                                                                                                                                                |
| w(m/s)         | speed of sound $w/m\cdot s^{-1}$ , including diffraction correction                                                                                                                                                                     |
| sigma_T        | standard deviation in the temperature readings (K) taken before, during, and after a given set of 3 replicate echoes (see Section 2.6); this is a measure of the steadiness of the experimental conditions                              |
| sigma_p        | standard deviation in the pressure readings (MPa) taken before, during, and after a given set of 3 replicate echoes; this is a measure of the steadiness of the experimental conditions                                                 |
| sigma_w        | standard deviation in the sound speed determined from the 3 replicate echoes; large values here ( $> 0.01 m\cdot s^{-1}$ ) may indicate that the $\Delta t$ of one or more of the echoes may be in error by an integer number of cycles |
| N_temp         | number of temperatures and pressures recorded (normally 4 for 3 replicate echoes)                                                                                                                                                       |
| N_echo         | number of replicate echo signals recorded for a given T and p                                                                                                                                                                           |
| w_EOS          | speed of sound calculated by the equation of state referenced in the manuscript; note: for p-xylene, this is the EOS of Zhou et al., rather than the empirical fit presented in the manuscript                                          |
| del_EOS(%)     | relative difference between the measured speed of sound and that calculated by the EOS: $100*(w - w_{EOS})/w_{EOS}$                                                                                                                     |
| Tbath          | bath temperature (K) as recorded by the internal temperature sensor; this sensor was located away from the measuring cell, and the “T(K)” above should be used as the sample temperature                                                |
| dp/dT(%/hr)    | relative drift in the pressure over the time for the 3 replicate echo signals; this is a measure of the steadiness of the experimental conditions                                                                                       |
| u_T/K          | combined standard uncertainty in temperature, including Type A uncertainties and PRT and bath gradient effects                                                                                                                          |
| u_p/MPa        | combined standard uncertainty in pressure, including Type A uncertainties and transducer and hydrostatic head effects                                                                                                                   |
| u_w(m.s-1)     | standard uncertainty in speed of sound                                                                                                                                                                                                  |
| Uc(%)          | relative combined expanded uncertainty in speed of sound                                                                                                                                                                                |
